# Supplementary material for: From ‘halogen’ to ‘tetrel’ bonds: matrix isolation IR spectroscopic and quantum mechanical studies of the effect of central atom substitution in donor tetrahalogens on binary complex formation with formic acid
Source: Royal Society of Chemistry journal article supplement (doi:10.1039/d4cp01949k), 2024-01-01
Supplement: d4cp01949k1.pdf [file d4cp01949k1.pdf]

## Supporting Information

for

**From ‘halogen’ to ‘tetrel’ bond: Matrix isolation IR spectroscopic and quantum mechanical studies on effect of central atom substitution in donor tetrahalogens on binary complex formation with formic acid**

**Indrani Bhattacharya<sup>a</sup> and Pujarini Banerjee<sup>\*b</sup>**

- a) Department of Chemical and Biological Sciences, S.N. Bose National Centre for Basic Sciences, Kolkata, West Bengal, India
- b) Department of Chemistry, Diamond Harbour Women’s University, Sarisha, West Bengal, India

\*Email: [pujarini.banerjee87@gmail.com](mailto:pujarini.banerjee87@gmail.com)

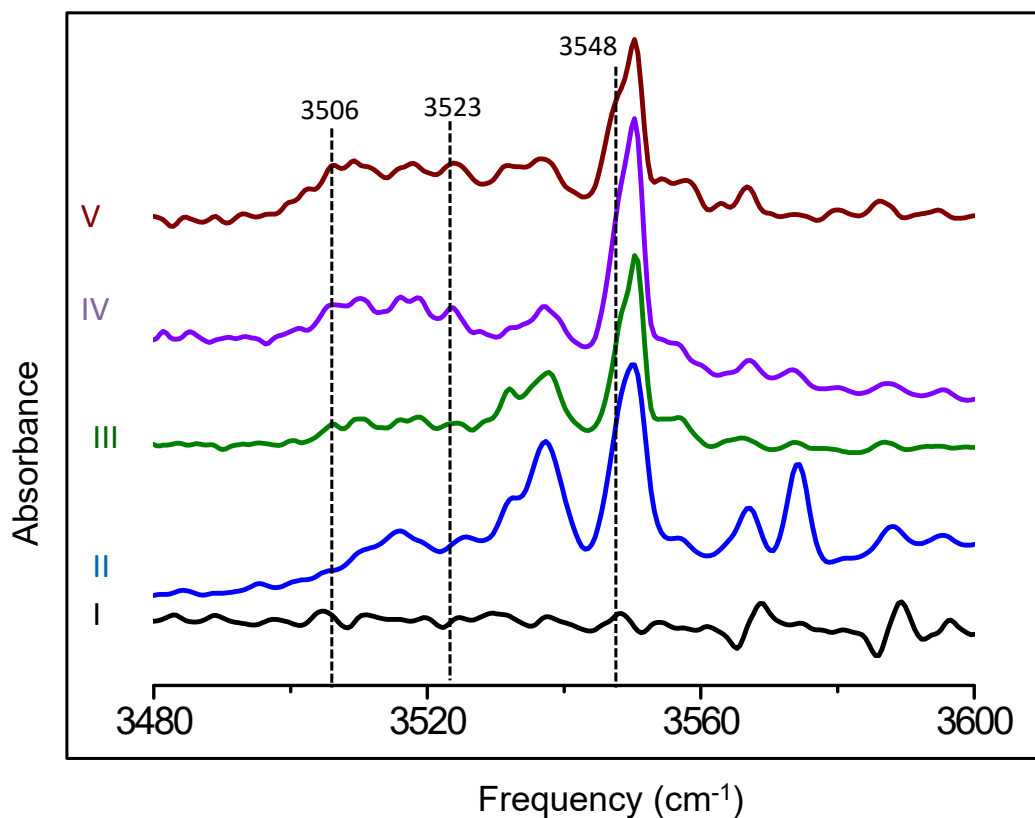

**Figure S1:** Infrared spectra in the  $\nu_{\text{O-H}}$  region of Formic Acid (FA) depicting complex formation with  $\text{SiCl}_4$  in Argon matrix. Trace I (black) depicts the  $\text{SiCl}_4$  monomer ( $\text{SiCl}_4:\text{Ar} = 1:200$ ) after annealing the matrix. Trace II (blue) depicts FA monomer ( $\text{FA}:\text{Ar} = 1:2000$ ) after annealing. Traces III (green), IV (violet) and V (wine) depict FA-  $\text{SiCl}_4$  mixtures in different concentration ratios ( $\text{FA}:\text{SiCl}_4:\text{Ar} = 1:2:2000$ ,  $1:5:2000$  and  $1:10:2000$ , respectively) after annealing. The positions of newly developed bands corresponding to formation of the FA- $\text{SiCl}_4$  complex have been marked with dotted lines.

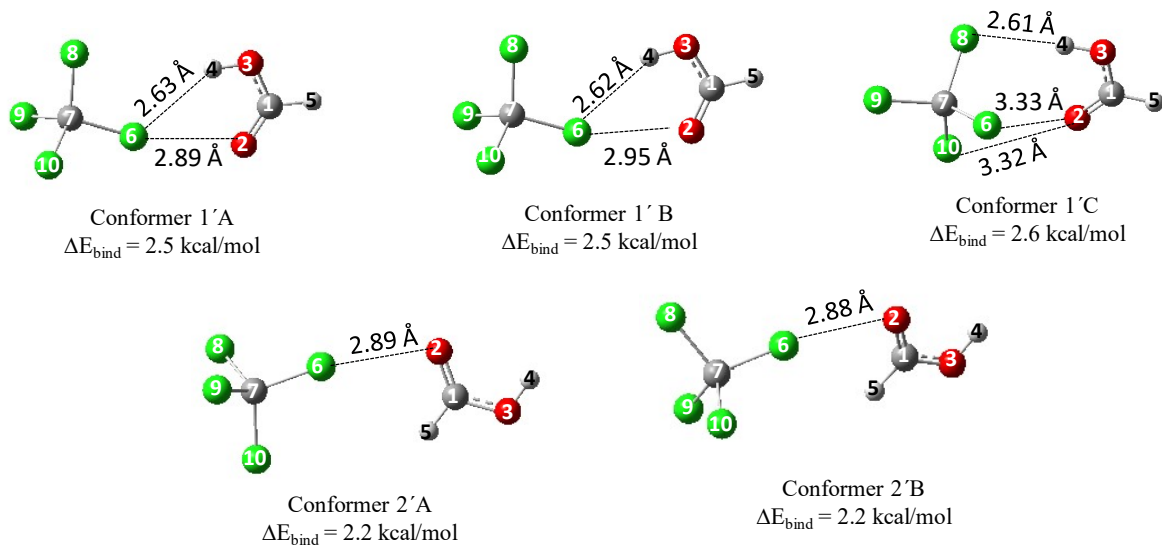

**Figure S2:** Optimized geometries and binding energies ( $\Delta E_{\text{bind}}$ ) of different conformers of the FA-CCl<sub>4</sub> complex (1:1) calculated at the M062X/6-31G++(d,p) level of theory. Relevant distance parameters are depicted in the figure.

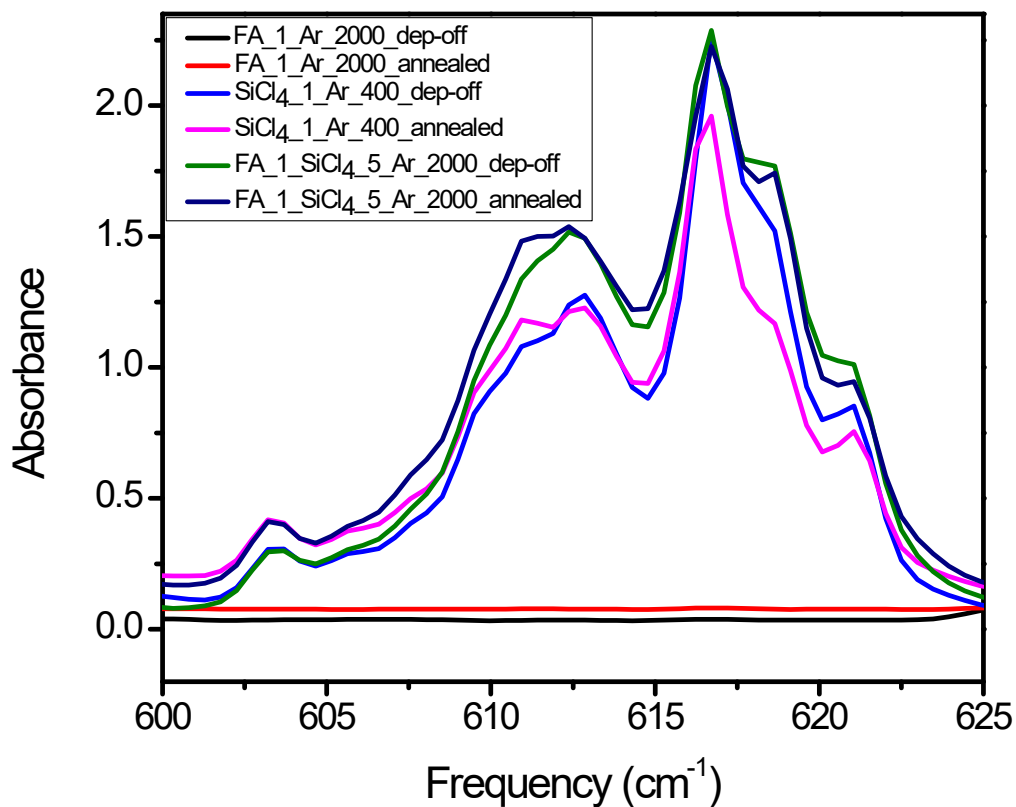

**Figure S3:** Infrared spectra in the  $\nu_{\text{Si-Cl}}$  region of SiCl<sub>4</sub> for different concentrations of FA and SiCl<sub>4</sub> in Argon matrix (mentioned in the figure). “Dep-off” refers to the spectra of the as-deposited matrix.

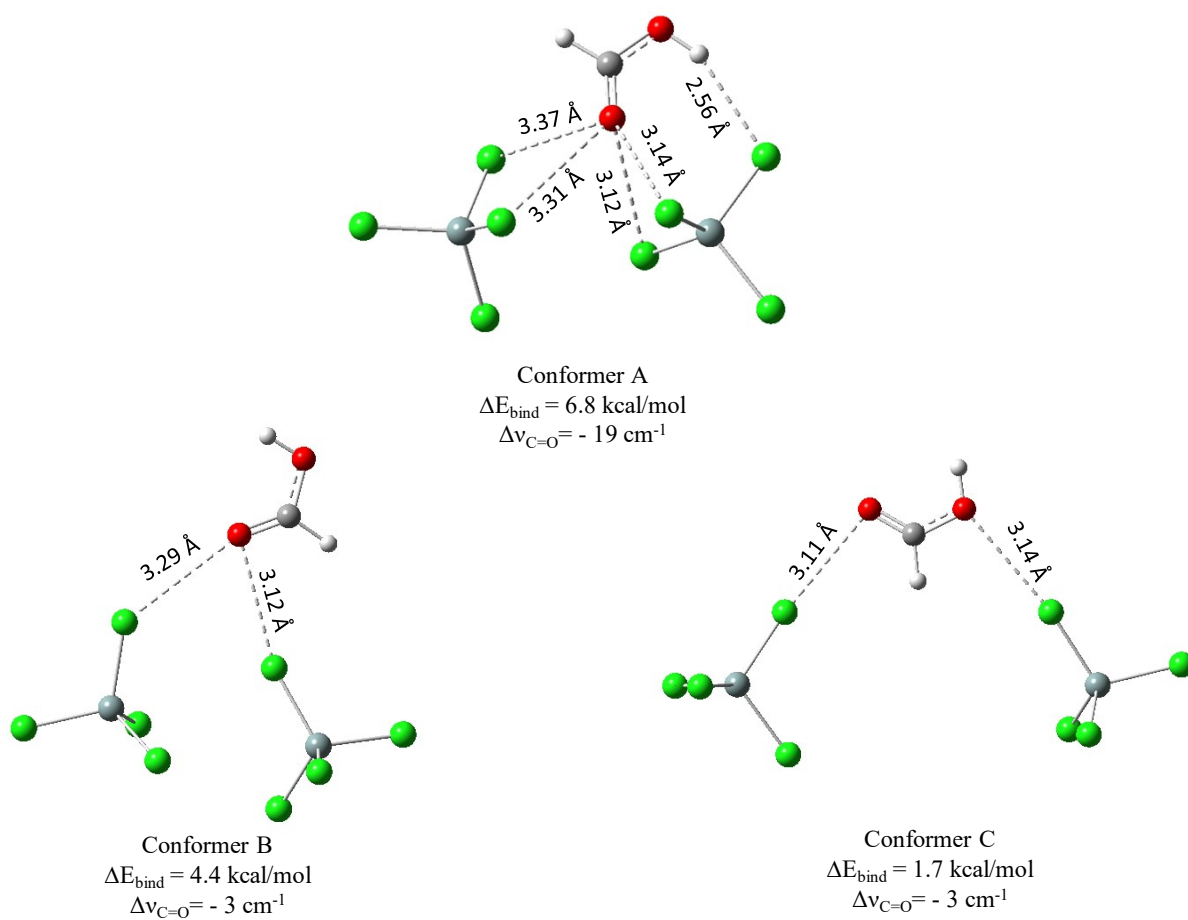

**Figure S4:** Optimized geometries of some of the conformers of the 1:2 FA-SiCl<sub>4</sub> complex calculated at M062X/6-31G++(d,p) level of theory with their corresponding  $\nu_{\text{C=O}}$  spectral shift and binding energies ( $\Delta E_{\text{bind}}$ ). Different distance parameters have been also shown in the figure.

**Table S1:** Predictions of binding energy and geometry as well as relevant data from AIM and NBO analyses obtained at MP2/6-31G++(d,p) level of theory for optimized structures of FA-SiCl<sub>4</sub> complexes.

| Predicted parameters<br>(FA-SiCl <sub>4</sub> )                 | Conformer<br>1A | Conformer<br>2A | Conformer<br>3A |
|-----------------------------------------------------------------|-----------------|-----------------|-----------------|
| $\Delta E_{\text{bind}}$ (kcal/mol)                             | 1.3             | 1.1             | 0.4             |
| O2...Cl10(Å)                                                    | 3.47            | 3.32            | -               |
| O2...Cl8(Å)                                                     | 3.25            | 3.24            | -               |
| O2...Cl6(Å)                                                     | 3.25            | 3.24            | 3.27            |
| O2...Si7(Å)                                                     | 3.35            | 3.28            | 5.22            |
| H4...Cl10(Å)                                                    | 2.52            | -               | -               |
| H4...Cl8(Å)                                                     | -               | -               | -               |
| H4...Cl6(Å)                                                     | -               | -               | -               |
| Si7-Cl10-O2(deg)                                                | 69.4            | 70.9            | -               |
| Si7-Cl8-O2(deg)                                                 | 75.0            | 73.0            | -               |
| Si7-Cl6-O2(deg)                                                 | 75.0            | 73.0            | 160.6           |
| O3-H4-Cl10(deg)                                                 | 165.8           | -               | -               |
| O3-H4-Cl8(deg)                                                  | -               | -               | -               |
| O3-H4-Cl6(deg)                                                  | -               | -               | -               |
| Cl9-Si-O2(deg)                                                  | 177.1           | 178.9           | -               |
| $\rho_{\text{BCP}}$ (O2...Cl6)(a.u)                             | 0.0076          | 0.0078          | 0.0068          |
| $\rho_{\text{BCP}}$ (O2...Cl8)(a.u)                             | 0.0076          | 0.0078          | -               |
| $\rho_{\text{BCP}}$ (O2...Cl10)(a.u)                            | 0.0064          | 0.0078          | -               |
| $\rho_{\text{BCP}}$ (H4...Cl10)(a.u)                            | 0.0111          | -               | -               |
| $\rho_{\text{BCP}}$ (H4...Cl6)(a.u)                             | -               | -               | -               |
| $\rho_{\text{BCP}}$ (H4...Cl8)(a.u)                             | -               | -               | -               |
| $\rho_{\text{BCP}}$ (O2...Si7)(a.u)                             | -               | 0.0074          | -               |
| $n(\text{O2}) \rightarrow \sigma^*(\text{Si7-Cl10})$ (kcal/mol) | 0.3             | 0.43            | -               |

|                                 |      |      |     |
|---------------------------------|------|------|-----|
| n(O2)→σ*(Si7-C18)<br>(kcal/mol) | 0.3  | 0.39 | -   |
| n(O2)→σ*(Si7-C16)<br>(kcal/mol) | 0.3  | 0.39 | 0.2 |
| n(O2)→σ*(C19-Si7)<br>(kcal/mol) | 1.67 | 2.04 | -   |
| n(C110)→σ*(O3-H4)<br>(kcal/mol) | 5.59 | -    | -   |
| n(C18)→σ*(O3-H4)<br>(kcal/mol)  | -    | -    | -   |
| n(C16)→σ*(O3-H4)<br>(kcal/mol)  | -    | -    | -   |

**Table S2:** Predictions of binding energy, spectral shifts, geometry, as well as relevant data from AIM and NBO analyses obtained at  $\omega$ B97XD/6-31G++(d,p) level of theory for optimized structures of FA-SiCl<sub>4</sub> complexes.

| Predicted parameters<br>(FA-SiCl <sub>4</sub> )              | Conformer<br>1A | Conformer<br>1B | Conformer<br>2A | Conformer<br>2B | Conformer<br>3A | Conformer<br>3B |
|--------------------------------------------------------------|-----------------|-----------------|-----------------|-----------------|-----------------|-----------------|
| $\Delta E_{\text{bind}}$ (kcal/mol)                          | 2.7             | 2.7             | 2.2             | 2.2             | 0.8             | 1.2             |
| $\Delta \nu_{\text{C-O}}$ (cm <sup>-1</sup> )                | -9              | -8              | -7              | -6              | -3              | -3              |
| $\Delta \nu_{\text{C=O}}$ (cm <sup>-1</sup> )                | +15             | +15             | +9              | +8              | +3              | +7              |
| O2...C110(Å)                                                 | 3.59            | 3.45            | 3.44            | 3.41            | -               | -               |
| O2...C18(Å)                                                  | 3.43            | 3.44            | 3.41            | 3.43            | -               | -               |
| O2...C16(Å)                                                  | 3.44            | 3.59            | 3.41            | 3.43            | 3.13            | 3.14            |
| O2...Si7(Å)                                                  | 3.56            | 3.56            | 3.46            | 3.47            | 5.46            | 5.30            |
| H4...C110(Å)                                                 | 2.60            | -               | -               | -               | -               | -               |
| H4...C18(Å)                                                  | -               | -               | -               | -               | -               | -               |
| H4...C16(Å)                                                  | -               | 2.60            | -               | -               | -               | 2.73            |
| Si7-C110-O2(deg)                                             | 72.5            | 76.3            | 73.4            | 74.5            | -               | -               |
| Si7-C18-O2(deg)                                              | 76.5            | 76.5            | 74.2            | 74.0            | -               | -               |
| Si7-C16-O2(deg)                                              | 76.3            | 72.6            | 74.2            | 74.0            | 160.1           | 147.7           |
| O3-H4-C110(deg)                                              | 166.6           | -               | -               | -               | -               | -               |
| O3-H4-C18(deg)                                               | -               | -               | -               | -               | -               | -               |
| O3-H4-C16(deg)                                               | -               | 166.4           | -               | -               | -               | 165.8           |
| C19-Si-O2(deg)                                               | 178.2           | 178.2           | 180.0           | 180.0           | -               | -               |
| $\rho_{\text{BCP}}(\text{O2}\cdots\text{C16})(\text{a.u.})$  | 0.0050          | 0.0050          | 0.0057          | 0.0055          | 0.0056          | -               |
| $\rho_{\text{BCP}}(\text{O2}\cdots\text{C18})(\text{a.u.})$  | 0.0056          | 0.0056          | 0.0057          | 0.0060          | -               | -               |
| $\rho_{\text{BCP}}(\text{O2}\cdots\text{C110})(\text{a.u.})$ | 0.0050          | 0.0050          | 0.0061          | 0.0060          | -               | -               |
| $\rho_{\text{BCP}}(\text{H4}\cdots\text{C110})(\text{a.u.})$ | 0.0094          | -               | -               | -               | -               | -               |
| $\rho_{\text{BCP}}(\text{H4}\cdots\text{C16})(\text{a.u.})$  | -               | 0.0094          | -               | -               | -               | 0.0074          |
| $\rho_{\text{BCP}}(\text{H4}\cdots\text{C18})(\text{a.u.})$  | -               | -               | -               | -               | -               | -               |
| $\rho_{\text{BCP}}(\text{O2}\cdots\text{Si7})(\text{a.u.})$  | -               | -               | 0.0056          | 0.0056          | -               | -               |



|                               |      |      |      |      |      |      |
|-------------------------------|------|------|------|------|------|------|
| n(O2)→σ*(Si7-Cl10) (kcal/mol) | 0.15 | 0.09 | 0.23 | 0.17 | -    | -    |
| n(O2)→σ*(Si7-Cl8) (kcal/mol)  | 0.11 | 0.11 | 0.21 | 0.22 | -    | -    |
| n(O2)→σ*(Si7-Cl6) (kcal/mol)  | 0.09 | 0.14 | 0.21 | 0.22 | 0.21 | 0.08 |
| n(O2)→σ*(Cl9-Si7) (kcal/mol)  | 0.95 | 0.95 | 1.31 | 1.27 | -    | -    |
| n(Cl10)→σ*(O3-H4) (kcal/mol)  | 4.31 | -    | -    | -    | -    | -    |
| n(Cl8)→σ*(O3-H4) (kcal/mol)   | -    | -    | -    | -    | -    | -    |
| n(Cl6)→σ*(O3-H4) (kcal/mol)   | -    | 4.27 | -    | -    | -    | 2.91 |

**Table S3:** Experimental and calculated  $\nu_{C=O}$  and  $\nu_{C-O}$  band positions of FA and their spectral shifts for different conformers of the binary FA-SiCl<sub>4</sub> complex at the M062X/6-311++G(d,p), MP2/6-311++G(d,p) and  $\omega$ B97XD/6-311++G(d,p) levels of theory.

| Conformer  | Calculated band positions (cm <sup>-1</sup> ) |             |             |             |                |             | Calculated spectral shifts (cm <sup>-1</sup> ) |                   |                   |                   |                   |                   |
|------------|-----------------------------------------------|-------------|-------------|-------------|----------------|-------------|------------------------------------------------|-------------------|-------------------|-------------------|-------------------|-------------------|
|            | M06-2X                                        |             | MP2         |             | $\omega$ B97XD |             | M06-2X                                         |                   | MP2               |                   | $\omega$ B97XD    |                   |
|            | $\nu_{C=O}$                                   | $\nu_{C-O}$ | $\nu_{C=O}$ | $\nu_{C-O}$ | $\nu_{C=O}$    | $\nu_{C-O}$ | $\Delta\nu_{C=O}$                              | $\Delta\nu_{C-O}$ | $\Delta\nu_{C=O}$ | $\Delta\nu_{C-O}$ | $\Delta\nu_{C=O}$ | $\Delta\nu_{C-O}$ |
| FA monomer | 1879                                          | 1169        | 1807        | 1143        | 1859           | 1163        | -                                              | -                 | -                 | -                 | -                 | -                 |
| 1A         | 1862                                          | 1190        | 1800        | 1161        | 1847           | 1177        | -17                                            | +21               | -7                | +18               | -12               | +14               |
| 1B         | 1863                                          | 1182        | -           | -           | 1847           | 1177        | -16                                            | +13               | -                 | -                 | -12               | +14               |
| 2A         | 1864                                          | 1181        | 1804        | 1151        | 1848           | 1169        | -15                                            | +12               | -3                | +8                | -11               | +6                |
| 2B         | 1864                                          | 1180        | -           | -           | 1849           | 1169        | -15                                            | +11               | -                 | -                 | -10               | +6                |
| 3A         | 1878                                          | 1172        | 1806        | 1144        | 1856           | 1167        | -1                                             | +3                | -1                | +1                | -3                | +4                |
| 3B         | -                                             | -           | -           | -           | 1856           | 1169        | -                                              | -                 | -                 | -                 | -3                | +6                |

**Table S4:** Experimental and calculated  $\nu_{\text{O-H}}$  band positions of FA in the monomer and different conformers of the binary FA-SiCl<sub>4</sub> complex at the M062X/ 6-31G++(d,p), MP2/6-31G++(d,p) and  $\omega$ B97XD/6-31G++(d,p) levels of theory.

| Conformer  | Calculated $\nu_{\text{O-H}}$ band positions (cm <sup>-1</sup> ) |      |                | Calculated spectral shift (cm <sup>-1</sup> ) |     |                | Experimental $\nu_{\text{O-H}}$ band positions (cm <sup>-1</sup> ) | Experimental spectral shift (cm <sup>-1</sup> ) |
|------------|------------------------------------------------------------------|------|----------------|-----------------------------------------------|-----|----------------|--------------------------------------------------------------------|-------------------------------------------------|
|            | M06-2X                                                           | MP2  | $\omega$ B97XD | M06-2X                                        | MP2 | $\omega$ B97XD |                                                                    |                                                 |
| FA monomer | 3810                                                             | 3786 | 3826           | -                                             | -   | -              | 3550                                                               | -                                               |
| 1A         | 3768                                                             | 3754 | 3774           | -42                                           | -32 | -52            | 3506<br>3523<br>3548                                               | -44<br>-27<br>-2                                |
| 1B         | 3780                                                             | -    | 3775           | -30                                           | -   | -51            |                                                                    |                                                 |
| 2A         | 3808                                                             | 3782 | 3826           | -2                                            | -4  | 0              |                                                                    |                                                 |
| 2B         | 3819                                                             | -    | 3823           | +9                                            | -   | -3             |                                                                    |                                                 |
| 3A         | 3798                                                             | 3784 | 3824           | -12                                           | -2  | -2             |                                                                    |                                                 |
| 3B         | 3785                                                             | -    | 3793           | -25                                           | -   | -33            |                                                                    |                                                 |
